# Supplementary material
Source: publisher figshare collection journal article supplement (https://tandf.figshare.com/ndownloader/files/28632793)
Supplement: Supplementary file 1 [file 28632793]

**Supplemental Table 1.** Top five matches in the GenBank database for ITS sequences from *Exobasidium* sp. isolates from this study. The BLASTn algorithm was used with the trimmed, corrected sequence from each isolate

| **Isolate** | **Accession** | [**Species**](https://blast.ncbi.nlm.nih.gov/Blast.cgi) | **Isolate ID** | [**Max Score**](https://blast.ncbi.nlm.nih.gov/Blast.cgi?CMD=Get&ADV_VIEW=yes&ADV_VIEW=on&ALIGNMENTS=100&ALIGNMENT_VIEW=Pairwise&DATABASE_SORT=0&DESCRIPTIONS=100&DYNAMIC_FORMAT=on&FIRST_QUERY_NUM=0&FORMAT_NUM_ORG=1&FORMAT_OBJECT=Alignment&FORMAT_PAGE_TARGET=&FORMAT_TYPE=HTML&GET_SEQUENCE=yes&I_THRESH=&LINE_LENGTH=60&MASK_CHAR=2&MASK_COLOR=1&NUM_OVERVIEW=100&NUM_QUERIES=3&PAGE=MegaBlast&QUERY_INDEX=2&QUERY_NUMBER=0&RESULTS_PAGE_TARGET=&RID=D2D4PHJF016&SHOW_LINKOUT=yes&SHOW_OVERVIEW=yes&STEP_NUMBER=&ADV_VIEW=on&DISPLAY_SORT=1&HSP_SORT=1) | [**Total Score**](https://blast.ncbi.nlm.nih.gov/Blast.cgi?CMD=Get&ADV_VIEW=yes&ADV_VIEW=on&ALIGNMENTS=100&ALIGNMENT_VIEW=Pairwise&DATABASE_SORT=0&DESCRIPTIONS=100&DYNAMIC_FORMAT=on&FIRST_QUERY_NUM=0&FORMAT_NUM_ORG=1&FORMAT_OBJECT=Alignment&FORMAT_PAGE_TARGET=&FORMAT_TYPE=HTML&GET_SEQUENCE=yes&I_THRESH=&LINE_LENGTH=60&MASK_CHAR=2&MASK_COLOR=1&NUM_OVERVIEW=100&NUM_QUERIES=3&PAGE=MegaBlast&QUERY_INDEX=2&QUERY_NUMBER=0&RESULTS_PAGE_TARGET=&RID=D2D4PHJF016&SHOW_LINKOUT=yes&SHOW_OVERVIEW=yes&STEP_NUMBER=&ADV_VIEW=on&DISPLAY_SORT=2&HSP_SORT=1) | [**Query Cover**](https://blast.ncbi.nlm.nih.gov/Blast.cgi?CMD=Get&ADV_VIEW=yes&ADV_VIEW=on&ALIGNMENTS=100&ALIGNMENT_VIEW=Pairwise&DATABASE_SORT=0&DESCRIPTIONS=100&DYNAMIC_FORMAT=on&FIRST_QUERY_NUM=0&FORMAT_NUM_ORG=1&FORMAT_OBJECT=Alignment&FORMAT_PAGE_TARGET=&FORMAT_TYPE=HTML&GET_SEQUENCE=yes&I_THRESH=&LINE_LENGTH=60&MASK_CHAR=2&MASK_COLOR=1&NUM_OVERVIEW=100&NUM_QUERIES=3&PAGE=MegaBlast&QUERY_INDEX=2&QUERY_NUMBER=0&RESULTS_PAGE_TARGET=&RID=D2D4PHJF016&SHOW_LINKOUT=yes&SHOW_OVERVIEW=yes&STEP_NUMBER=&ADV_VIEW=on&DISPLAY_SORT=4&HSP_SORT=0) **(%)** | [**E-value**](https://blast.ncbi.nlm.nih.gov/Blast.cgi?CMD=Get&ADV_VIEW=yes&ADV_VIEW=on&ALIGNMENTS=100&ALIGNMENT_VIEW=Pairwise&DATABASE_SORT=0&DESCRIPTIONS=100&DYNAMIC_FORMAT=on&FIRST_QUERY_NUM=0&FORMAT_NUM_ORG=1&FORMAT_OBJECT=Alignment&FORMAT_PAGE_TARGET=&FORMAT_TYPE=HTML&GET_SEQUENCE=yes&I_THRESH=&LINE_LENGTH=60&MASK_CHAR=2&MASK_COLOR=1&NUM_OVERVIEW=100&NUM_QUERIES=3&PAGE=MegaBlast&QUERY_INDEX=2&QUERY_NUMBER=0&RESULTS_PAGE_TARGET=&RID=D2D4PHJF016&SHOW_LINKOUT=yes&SHOW_OVERVIEW=yes&STEP_NUMBER=&ADV_VIEW=on&DISPLAY_SORT=0&HSP_SORT=0) | [**Percent Ident**](https://blast.ncbi.nlm.nih.gov/Blast.cgi?CMD=Get&ADV_VIEW=yes&ADV_VIEW=on&ALIGNMENTS=100&ALIGNMENT_VIEW=Pairwise&DATABASE_SORT=0&DESCRIPTIONS=100&DYNAMIC_FORMAT=on&FIRST_QUERY_NUM=0&FORMAT_NUM_ORG=1&FORMAT_OBJECT=Alignment&FORMAT_PAGE_TARGET=&FORMAT_TYPE=HTML&GET_SEQUENCE=yes&I_THRESH=&LINE_LENGTH=60&MASK_CHAR=2&MASK_COLOR=1&NUM_OVERVIEW=100&NUM_QUERIES=3&PAGE=MegaBlast&QUERY_INDEX=2&QUERY_NUMBER=0&RESULTS_PAGE_TARGET=&RID=D2D4PHJF016&SHOW_LINKOUT=yes&SHOW_OVERVIEW=yes&STEP_NUMBER=&ADV_VIEW=on&DISPLAY_SORT=3&HSP_SORT=3)**ity (%)** |
| --- | --- | --- | --- | --- | --- | --- | --- | --- |
| 2017.03.23_TT_03 | FJ896132.1 | *E. rostrupii* | TUB 019165 | 848 | 848 | 98% | 0 | 94.88% |
| KY424482.1 | *E. uvae-ursi* | GLM-F105774 | 843 | 843 | 98% | 0 | 94.57% |
| KR262425.1 | *E. rostrupii* | CNJ2-3 | 839 | 839 | 98% | 0 | 94.70% |
| KR262424.1 | *E. rostrupii* | CNJ2-2 | 839 | 839 | 98% | 0 | 94.70% |
| KR262423.1 | *E. rostrupii* | CNJ2-1 | 839 | 839 | 98% | 0 | 94.70% |
| 2017.06.30_AV_01 | FJ896132.1 | *E. rostrupii* | TUB 019165 | 872 | 872 | 100% | 0 | 95.32% |
| KR262425.1 | *E. rostrupii* | CNJ2-3 | 865 | 865 | 100% | 0 | 95.13% |
| KR262424.1 | *E. rostrupii* | CNJ2-2 | 865 | 865 | 100% | 0 | 95.13% |
| KR262423.1 | *E. rostrupii* | CNJ2-1 | 865 | 865 | 100% | 0 | 95.13% |
| KY424482.1 | *E. uvae-ursi* | GLM-F105774 | 863 | 863 | 100% | 0 | 94.82% |
| 2017.07.14_SC_02 | FJ896132.1 | *E. rostrupii* | TUB 019165 | 804 | 804 | 100% | 0 | 92.45% |
| KR262425.1 | *E. rostrupii* | CNJ2-3 | 795 | 795 | 100% | 0 | 92.27% |
| KR262424.1 | *E. rostrupii* | CNJ2-2 | 795 | 795 | 100% | 0 | 92.27% |
| KR262423.1 | *E. rostrupii* | CNJ2-1 | 795 | 795 | 100% | 0 | 92.27% |
| KY424482.1 | *E. uvae-ursi* | GLM-F105774 | 793 | 793 | 100% | 0 | 91.96% |
| 2017.07.14_SC_05b | KY424482.1 | *E. uvae-ursi* | GLM-F105774 | 857 | 857 | 99% | 0 | 94.94% |
| FJ896132.1 | *E. rostrupii* | TUB 019165 | 857 | 857 | 99% | 0 | 95.08% |
| KR262425.1 | *E. rostrupii* | CNJ2-3 | 848 | 848 | 99% | 0 | 94.90% |
| KR262424.1 | *E. rostrupii* | CNJ2-2 | 848 | 848 | 99% | 0 | 94.90% |
| KR262423.1 | *E. rostrupii* | CNJ2-1 | 848 | 848 | 99% | 0 | 94.90% |
| 2017.07.10_RL_02 | FJ896132.1 | *E. rostrupii* | TUB 019165 | 798 | 798 | 88% | 0 | 95.91% |
| KY424482.1 | *E. uvae-ursi* | GLM-F105774 | 793 | 793 | 88% | 0 | 95.71% |
| KR262425.1 | *E. rostrupii* | CNJ2-3 | 789 | 789 | 88% | 0 | 95.70% |
| KR262424.1 | *E. rostrupii* | CNJ2-2 | 789 | 789 | 88% | 0 | 95.70% |
| KR262423.1 | *E. rostrupii* | CNJ2-1 | 789 | 789 | 88% | 0 | 95.70% |

**Supplemental Table 2.** Top five type strain matches in the GenBank database for ITS sequences from *Exobasidium* sp. isolates from this study. The BLASTn algorithm was used with the trimmed, corrected sequences from each isolate

| **Isolate** | **Accession** | [**Species**](https://blast.ncbi.nlm.nih.gov/Blast.cgi) | **Isolate ID** | [**Max Score**](https://blast.ncbi.nlm.nih.gov/Blast.cgi?CMD=Get&ADV_VIEW=yes&ADV_VIEW=on&ALIGNMENTS=100&ALIGNMENT_VIEW=Pairwise&DATABASE_SORT=0&DESCRIPTIONS=100&DYNAMIC_FORMAT=on&FIRST_QUERY_NUM=0&FORMAT_NUM_ORG=1&FORMAT_OBJECT=Alignment&FORMAT_PAGE_TARGET=&FORMAT_TYPE=HTML&GET_SEQUENCE=yes&I_THRESH=&LINE_LENGTH=60&MASK_CHAR=2&MASK_COLOR=1&NUM_OVERVIEW=100&NUM_QUERIES=3&PAGE=MegaBlast&QUERY_INDEX=2&QUERY_NUMBER=0&RESULTS_PAGE_TARGET=&RID=D2D4PHJF016&SHOW_LINKOUT=yes&SHOW_OVERVIEW=yes&STEP_NUMBER=&ADV_VIEW=on&DISPLAY_SORT=1&HSP_SORT=1) | [**Total Score**](https://blast.ncbi.nlm.nih.gov/Blast.cgi?CMD=Get&ADV_VIEW=yes&ADV_VIEW=on&ALIGNMENTS=100&ALIGNMENT_VIEW=Pairwise&DATABASE_SORT=0&DESCRIPTIONS=100&DYNAMIC_FORMAT=on&FIRST_QUERY_NUM=0&FORMAT_NUM_ORG=1&FORMAT_OBJECT=Alignment&FORMAT_PAGE_TARGET=&FORMAT_TYPE=HTML&GET_SEQUENCE=yes&I_THRESH=&LINE_LENGTH=60&MASK_CHAR=2&MASK_COLOR=1&NUM_OVERVIEW=100&NUM_QUERIES=3&PAGE=MegaBlast&QUERY_INDEX=2&QUERY_NUMBER=0&RESULTS_PAGE_TARGET=&RID=D2D4PHJF016&SHOW_LINKOUT=yes&SHOW_OVERVIEW=yes&STEP_NUMBER=&ADV_VIEW=on&DISPLAY_SORT=2&HSP_SORT=1) | [**Query Cover**](https://blast.ncbi.nlm.nih.gov/Blast.cgi?CMD=Get&ADV_VIEW=yes&ADV_VIEW=on&ALIGNMENTS=100&ALIGNMENT_VIEW=Pairwise&DATABASE_SORT=0&DESCRIPTIONS=100&DYNAMIC_FORMAT=on&FIRST_QUERY_NUM=0&FORMAT_NUM_ORG=1&FORMAT_OBJECT=Alignment&FORMAT_PAGE_TARGET=&FORMAT_TYPE=HTML&GET_SEQUENCE=yes&I_THRESH=&LINE_LENGTH=60&MASK_CHAR=2&MASK_COLOR=1&NUM_OVERVIEW=100&NUM_QUERIES=3&PAGE=MegaBlast&QUERY_INDEX=2&QUERY_NUMBER=0&RESULTS_PAGE_TARGET=&RID=D2D4PHJF016&SHOW_LINKOUT=yes&SHOW_OVERVIEW=yes&STEP_NUMBER=&ADV_VIEW=on&DISPLAY_SORT=4&HSP_SORT=0) **(%)** | [**E-value**](https://blast.ncbi.nlm.nih.gov/Blast.cgi?CMD=Get&ADV_VIEW=yes&ADV_VIEW=on&ALIGNMENTS=100&ALIGNMENT_VIEW=Pairwise&DATABASE_SORT=0&DESCRIPTIONS=100&DYNAMIC_FORMAT=on&FIRST_QUERY_NUM=0&FORMAT_NUM_ORG=1&FORMAT_OBJECT=Alignment&FORMAT_PAGE_TARGET=&FORMAT_TYPE=HTML&GET_SEQUENCE=yes&I_THRESH=&LINE_LENGTH=60&MASK_CHAR=2&MASK_COLOR=1&NUM_OVERVIEW=100&NUM_QUERIES=3&PAGE=MegaBlast&QUERY_INDEX=2&QUERY_NUMBER=0&RESULTS_PAGE_TARGET=&RID=D2D4PHJF016&SHOW_LINKOUT=yes&SHOW_OVERVIEW=yes&STEP_NUMBER=&ADV_VIEW=on&DISPLAY_SORT=0&HSP_SORT=0) | [**Percent Ident**](https://blast.ncbi.nlm.nih.gov/Blast.cgi?CMD=Get&ADV_VIEW=yes&ADV_VIEW=on&ALIGNMENTS=100&ALIGNMENT_VIEW=Pairwise&DATABASE_SORT=0&DESCRIPTIONS=100&DYNAMIC_FORMAT=on&FIRST_QUERY_NUM=0&FORMAT_NUM_ORG=1&FORMAT_OBJECT=Alignment&FORMAT_PAGE_TARGET=&FORMAT_TYPE=HTML&GET_SEQUENCE=yes&I_THRESH=&LINE_LENGTH=60&MASK_CHAR=2&MASK_COLOR=1&NUM_OVERVIEW=100&NUM_QUERIES=3&PAGE=MegaBlast&QUERY_INDEX=2&QUERY_NUMBER=0&RESULTS_PAGE_TARGET=&RID=D2D4PHJF016&SHOW_LINKOUT=yes&SHOW_OVERVIEW=yes&STEP_NUMBER=&ADV_VIEW=on&DISPLAY_SORT=3&HSP_SORT=3)**ity (%)** |
| --- | --- | --- | --- | --- | --- | --- | --- | --- |
| 2017.03.23_TT_03 | NR_120076.1 | *E. ferrugineae* | BPI 882571 | 573 | 573 | 87% | 2.00E-160 | 88.02% |
| NR_073343.1 | *Meira geulakonigii* | CBS 110052 | 294 | 294 | 38% | 1.00E-76 | 91.59% |
| NR_161035.1 | *Entyloma jolantae* | KRAM F-59030 | 289 | 289 | 31% | 7.00E-75 | 96.57% |
| NR_161036.1 | *Entyloma eburneum* | KRAM F-59037 | 289 | 289 | 31% | 7.00E-75 | 96.57% |
| KU163607.1 | *Entyloma helianthi* | CDFA 420P06278669 | 289 | 289 | 31% | 7.00E-75 | 96.57% |
| 2017.06.30_AV_01 | NR_120076.1 | *E. ferrugineae* | BPI 882571 | 588 | 588 | 88% | 6.00E-165 | 88.39% |
| NR_073343.1 | *Meira geulakonigii* | CBS 110052 | 294 | 294 | 38% | 1.00E-76 | 91.59% |
| NR_161035.1 | *Entyloma jolantae* | KRAM F-59030 | 289 | 289 | 31% | 7.00E-75 | 96.57% |
| NR_161036.1 | *Entyloma eburneum* | KRAM F-59037 | 289 | 289 | 31% | 7.00E-75 | 96.57% |
| KU163607.1 | *Entyloma helianthi* | CDFA 420P06278669 | 289 | 289 | 31% | 7.00E-75 | 96.57% |
| 2017.07.14_SC_02 | NR_120076.1 | *E. ferrugineae* | BPI 882571 | 536 | 536 | 79% | 2.00E-149 | 88.65% |
| NR_073343.1 | *Meira geulakonigii* | CBS 110052 | 298 | 298 | 39% | 1.00E-77 | 90.99% |
| JQ906776.1 | *Meira miltonrushii* | ATCC MYA-4883 | 292 | 292 | 39% | 5.00E-76 | 90.91% |
| NR_120190.1 | *Meira miltonrushii* | ATCC:MYA-4883 | 292 | 292 | 39% | 5.00E-76 | 90.91% |
| NR_161035.1 | *Entyloma jolantae* | KRAM F-59030 | 289 | 289 | 31% | 7.00E-75 | 96.57% |
| 2017.07.14_SC_05b | NR_120076.1 | *E. ferrugineae* | BPI 882571 | 588 | 588 | 96% | 6.00E-165 | 86.57% |
| NR_073343.1 | *Meira geulakonigii* | CBS 110052 | 294 | 294 | 38% | 1.00E-76 | 91.59% |
| NR_161035.1 | *Entyloma jolantae* | KRAM F-59030 | 289 | 289 | 31% | 7.00E-75 | 96.57% |
| NR_161036.1 | *Entyloma eburneum* | KRAM F-59037 | 289 | 289 | 31% | 7.00E-75 | 96.57% |
| KU163607.1 | *Entyloma helianthi* | CDFA 420P06278669 | 289 | 289 | 31% | 7.00E-75 | 96.57% |
| 2017.07.10_RL_02 | NR_120076.1 | *E. ferrugineae* | BPI 882571 | 571 | 571 | 87% | 6.00E-160 | 87.67% |
| NR_073343.1 | *Meira geulakonigii* | CBS 110052 | 294 | 294 | 38% | 1.00E-76 | 91.59% |
| NR_161035.1 | *Entyloma jolantae* | KRAM F-59030 | 289 | 289 | 31% | 7.00E-75 | 96.57% |
| NR_161036.1 | *Entyloma eburneum* | KRAM F-59037 | 289 | 289 | 31% | 7.00E-75 | 96.57% |
| KU163607.1 | *Entyloma helianthi* | CDFA 420P06278669 | 289 | 289 | 31% | 7.00E-75 | 96.57% |

**Supplemental Table 3.** Top five matches in the GenBank database for LSU sequences from *Exobasidium* sp. isolates from this study. The BLASTn algorithm was used with the trimmed, corrected sequence from each isolate

| **Isolate** | **Accession** | [**Species**](https://blast.ncbi.nlm.nih.gov/Blast.cgi) | **Isolate ID** | [**Max Score**](https://blast.ncbi.nlm.nih.gov/Blast.cgi?CMD=Get&ADV_VIEW=yes&ADV_VIEW=on&ALIGNMENTS=100&ALIGNMENT_VIEW=Pairwise&DATABASE_SORT=0&DESCRIPTIONS=100&DYNAMIC_FORMAT=on&FIRST_QUERY_NUM=0&FORMAT_NUM_ORG=1&FORMAT_OBJECT=Alignment&FORMAT_PAGE_TARGET=&FORMAT_TYPE=HTML&GET_SEQUENCE=yes&I_THRESH=&LINE_LENGTH=60&MASK_CHAR=2&MASK_COLOR=1&NUM_OVERVIEW=100&NUM_QUERIES=3&PAGE=MegaBlast&QUERY_INDEX=2&QUERY_NUMBER=0&RESULTS_PAGE_TARGET=&RID=D2D4PHJF016&SHOW_LINKOUT=yes&SHOW_OVERVIEW=yes&STEP_NUMBER=&ADV_VIEW=on&DISPLAY_SORT=1&HSP_SORT=1) | [**Total Score**](https://blast.ncbi.nlm.nih.gov/Blast.cgi?CMD=Get&ADV_VIEW=yes&ADV_VIEW=on&ALIGNMENTS=100&ALIGNMENT_VIEW=Pairwise&DATABASE_SORT=0&DESCRIPTIONS=100&DYNAMIC_FORMAT=on&FIRST_QUERY_NUM=0&FORMAT_NUM_ORG=1&FORMAT_OBJECT=Alignment&FORMAT_PAGE_TARGET=&FORMAT_TYPE=HTML&GET_SEQUENCE=yes&I_THRESH=&LINE_LENGTH=60&MASK_CHAR=2&MASK_COLOR=1&NUM_OVERVIEW=100&NUM_QUERIES=3&PAGE=MegaBlast&QUERY_INDEX=2&QUERY_NUMBER=0&RESULTS_PAGE_TARGET=&RID=D2D4PHJF016&SHOW_LINKOUT=yes&SHOW_OVERVIEW=yes&STEP_NUMBER=&ADV_VIEW=on&DISPLAY_SORT=2&HSP_SORT=1) | [**Query Cover**](https://blast.ncbi.nlm.nih.gov/Blast.cgi?CMD=Get&ADV_VIEW=yes&ADV_VIEW=on&ALIGNMENTS=100&ALIGNMENT_VIEW=Pairwise&DATABASE_SORT=0&DESCRIPTIONS=100&DYNAMIC_FORMAT=on&FIRST_QUERY_NUM=0&FORMAT_NUM_ORG=1&FORMAT_OBJECT=Alignment&FORMAT_PAGE_TARGET=&FORMAT_TYPE=HTML&GET_SEQUENCE=yes&I_THRESH=&LINE_LENGTH=60&MASK_CHAR=2&MASK_COLOR=1&NUM_OVERVIEW=100&NUM_QUERIES=3&PAGE=MegaBlast&QUERY_INDEX=2&QUERY_NUMBER=0&RESULTS_PAGE_TARGET=&RID=D2D4PHJF016&SHOW_LINKOUT=yes&SHOW_OVERVIEW=yes&STEP_NUMBER=&ADV_VIEW=on&DISPLAY_SORT=4&HSP_SORT=0) **(%)** | [**E-value**](https://blast.ncbi.nlm.nih.gov/Blast.cgi?CMD=Get&ADV_VIEW=yes&ADV_VIEW=on&ALIGNMENTS=100&ALIGNMENT_VIEW=Pairwise&DATABASE_SORT=0&DESCRIPTIONS=100&DYNAMIC_FORMAT=on&FIRST_QUERY_NUM=0&FORMAT_NUM_ORG=1&FORMAT_OBJECT=Alignment&FORMAT_PAGE_TARGET=&FORMAT_TYPE=HTML&GET_SEQUENCE=yes&I_THRESH=&LINE_LENGTH=60&MASK_CHAR=2&MASK_COLOR=1&NUM_OVERVIEW=100&NUM_QUERIES=3&PAGE=MegaBlast&QUERY_INDEX=2&QUERY_NUMBER=0&RESULTS_PAGE_TARGET=&RID=D2D4PHJF016&SHOW_LINKOUT=yes&SHOW_OVERVIEW=yes&STEP_NUMBER=&ADV_VIEW=on&DISPLAY_SORT=0&HSP_SORT=0) | [**Percent Ident**](https://blast.ncbi.nlm.nih.gov/Blast.cgi?CMD=Get&ADV_VIEW=yes&ADV_VIEW=on&ALIGNMENTS=100&ALIGNMENT_VIEW=Pairwise&DATABASE_SORT=0&DESCRIPTIONS=100&DYNAMIC_FORMAT=on&FIRST_QUERY_NUM=0&FORMAT_NUM_ORG=1&FORMAT_OBJECT=Alignment&FORMAT_PAGE_TARGET=&FORMAT_TYPE=HTML&GET_SEQUENCE=yes&I_THRESH=&LINE_LENGTH=60&MASK_CHAR=2&MASK_COLOR=1&NUM_OVERVIEW=100&NUM_QUERIES=3&PAGE=MegaBlast&QUERY_INDEX=2&QUERY_NUMBER=0&RESULTS_PAGE_TARGET=&RID=D2D4PHJF016&SHOW_LINKOUT=yes&SHOW_OVERVIEW=yes&STEP_NUMBER=&ADV_VIEW=on&DISPLAY_SORT=3&HSP_SORT=3)**ity (%)** |
| --- | --- | --- | --- | --- | --- | --- | --- | --- |
| 2017.07.23_TT_03 | KF134408.1 | *E. rostrupii* | E12CNJ1-1 | 977 | 977 | 100% | 0 | 99.08% |
| DQ025494.1 | *E. rostrupii* | PB 3275 | 966 | 966 | 100% | 0 | 98.71% |
| KF134417.1 | *E. rostrupii* | E80-1 | 965 | 965 | 100% | 0 | 98.71% |
| AF009857.1 | *E. rostrupii* | RB 949 | 965 | 965 | 99% | 0 | 98.71% |
| FJ896137.1 | *E. rostrupii* | TUB 019165 | 963 | 963 | 99% | 0 | 98.71% |
| 2017.07.10_RL_02 | KF134408.1 | *E. rostrupii* | E12CNJ1-1 | 972 | 972 | 100% | 0 | 98.90% |
| FJ896134.1 | *E. darwinii* | ML-2009a | 961 | 961 | 100% | 0 | 98.53% |
| DQ025494.1 | *E. rostrupii* | PB 3275 | 961 | 961 | 100% | 0 | 98.53% |
| KF134417.1 | *E. rostrupii* | E80-1 | 959 | 959 | 100% | 0 | 98.53% |
| AF009857.1 | *E. rostrupii* | RB 949 | 959 | 959 | 99% | 0 | 98.53% |

**Supplemental Table 4.** Top five type strain matches in the GenBank database for LSU sequences from *Exobasidium* sp. isolates from this study. The BLASTn algorithm was used with the trimmed, corrected sequences from each isolate

| **Isolate** | **Accession** | [**Species**](https://blast.ncbi.nlm.nih.gov/Blast.cgi) | **Isolate ID** | [**Max Score**](https://blast.ncbi.nlm.nih.gov/Blast.cgi?CMD=Get&ADV_VIEW=yes&ADV_VIEW=on&ALIGNMENTS=100&ALIGNMENT_VIEW=Pairwise&DATABASE_SORT=0&DESCRIPTIONS=100&DYNAMIC_FORMAT=on&FIRST_QUERY_NUM=0&FORMAT_NUM_ORG=1&FORMAT_OBJECT=Alignment&FORMAT_PAGE_TARGET=&FORMAT_TYPE=HTML&GET_SEQUENCE=yes&I_THRESH=&LINE_LENGTH=60&MASK_CHAR=2&MASK_COLOR=1&NUM_OVERVIEW=100&NUM_QUERIES=3&PAGE=MegaBlast&QUERY_INDEX=2&QUERY_NUMBER=0&RESULTS_PAGE_TARGET=&RID=D2D4PHJF016&SHOW_LINKOUT=yes&SHOW_OVERVIEW=yes&STEP_NUMBER=&ADV_VIEW=on&DISPLAY_SORT=1&HSP_SORT=1) | [**Total Score**](https://blast.ncbi.nlm.nih.gov/Blast.cgi?CMD=Get&ADV_VIEW=yes&ADV_VIEW=on&ALIGNMENTS=100&ALIGNMENT_VIEW=Pairwise&DATABASE_SORT=0&DESCRIPTIONS=100&DYNAMIC_FORMAT=on&FIRST_QUERY_NUM=0&FORMAT_NUM_ORG=1&FORMAT_OBJECT=Alignment&FORMAT_PAGE_TARGET=&FORMAT_TYPE=HTML&GET_SEQUENCE=yes&I_THRESH=&LINE_LENGTH=60&MASK_CHAR=2&MASK_COLOR=1&NUM_OVERVIEW=100&NUM_QUERIES=3&PAGE=MegaBlast&QUERY_INDEX=2&QUERY_NUMBER=0&RESULTS_PAGE_TARGET=&RID=D2D4PHJF016&SHOW_LINKOUT=yes&SHOW_OVERVIEW=yes&STEP_NUMBER=&ADV_VIEW=on&DISPLAY_SORT=2&HSP_SORT=1) | [**Query Cover**](https://blast.ncbi.nlm.nih.gov/Blast.cgi?CMD=Get&ADV_VIEW=yes&ADV_VIEW=on&ALIGNMENTS=100&ALIGNMENT_VIEW=Pairwise&DATABASE_SORT=0&DESCRIPTIONS=100&DYNAMIC_FORMAT=on&FIRST_QUERY_NUM=0&FORMAT_NUM_ORG=1&FORMAT_OBJECT=Alignment&FORMAT_PAGE_TARGET=&FORMAT_TYPE=HTML&GET_SEQUENCE=yes&I_THRESH=&LINE_LENGTH=60&MASK_CHAR=2&MASK_COLOR=1&NUM_OVERVIEW=100&NUM_QUERIES=3&PAGE=MegaBlast&QUERY_INDEX=2&QUERY_NUMBER=0&RESULTS_PAGE_TARGET=&RID=D2D4PHJF016&SHOW_LINKOUT=yes&SHOW_OVERVIEW=yes&STEP_NUMBER=&ADV_VIEW=on&DISPLAY_SORT=4&HSP_SORT=0) **(%)** | [**E-value**](https://blast.ncbi.nlm.nih.gov/Blast.cgi?CMD=Get&ADV_VIEW=yes&ADV_VIEW=on&ALIGNMENTS=100&ALIGNMENT_VIEW=Pairwise&DATABASE_SORT=0&DESCRIPTIONS=100&DYNAMIC_FORMAT=on&FIRST_QUERY_NUM=0&FORMAT_NUM_ORG=1&FORMAT_OBJECT=Alignment&FORMAT_PAGE_TARGET=&FORMAT_TYPE=HTML&GET_SEQUENCE=yes&I_THRESH=&LINE_LENGTH=60&MASK_CHAR=2&MASK_COLOR=1&NUM_OVERVIEW=100&NUM_QUERIES=3&PAGE=MegaBlast&QUERY_INDEX=2&QUERY_NUMBER=0&RESULTS_PAGE_TARGET=&RID=D2D4PHJF016&SHOW_LINKOUT=yes&SHOW_OVERVIEW=yes&STEP_NUMBER=&ADV_VIEW=on&DISPLAY_SORT=0&HSP_SORT=0) | [**Percent Ident**](https://blast.ncbi.nlm.nih.gov/Blast.cgi?CMD=Get&ADV_VIEW=yes&ADV_VIEW=on&ALIGNMENTS=100&ALIGNMENT_VIEW=Pairwise&DATABASE_SORT=0&DESCRIPTIONS=100&DYNAMIC_FORMAT=on&FIRST_QUERY_NUM=0&FORMAT_NUM_ORG=1&FORMAT_OBJECT=Alignment&FORMAT_PAGE_TARGET=&FORMAT_TYPE=HTML&GET_SEQUENCE=yes&I_THRESH=&LINE_LENGTH=60&MASK_CHAR=2&MASK_COLOR=1&NUM_OVERVIEW=100&NUM_QUERIES=3&PAGE=MegaBlast&QUERY_INDEX=2&QUERY_NUMBER=0&RESULTS_PAGE_TARGET=&RID=D2D4PHJF016&SHOW_LINKOUT=yes&SHOW_OVERVIEW=yes&STEP_NUMBER=&ADV_VIEW=on&DISPLAY_SORT=3&HSP_SORT=3)**ity (%)** |
| --- | --- | --- | --- | --- | --- | --- | --- | --- |
| 2017.07.23_TT_03 | NG_059219.1 | *E. maculosum* | ATCC MYA-4957 | 891 | 891 | 100% | 0 | 96.15% |
| JQ611711.1 | *E. ferrugineae* | BPI:882571 | 857 | 857 | 96% | 0 | 96.02% |
| KY108550.1 | *Pseudomicrostroma phylloplanum* | CBS8073 | 652 | 652 | 100% | 0 | 88.34% |
| AF190004.1 | *Microstroma phylloplanum* | CBS:8073 | 643 | 643 | 99% | 0 | 88.14% |
| MH868275.1 | *Tilletiopsis washingtonensis* | CBS 544.50 | 641 | 641 | 100% | 0 | 87.96% |
| 2017.07.10_RL_02 | NG_059219.1 | *E. maculosum* | ATCC MYA-4957 | 891 | 891 | 100% | 0 | 96.15% |
| JQ611711.1 | *E. ferrugineae* | BPI:882571 | 852 | 852 | 96% | 0 | 95.83% |
| KY108550.1 | *Pseudomicrostroma phylloplanum* | CBS8073 | 647 | 647 | 100% | 0 | 88.16% |
| AF190004.1 | *Microstroma phylloplanum* | CBS:8073 | 638 | 638 | 99% | 6.00E-180 | 87.96% |
| NG_059926.1 | *Sympodiomycopsis kandeliae* | BCRC 23165 | 636 | 636 | 100% | 2.00E-179 | 87.84% |
